# Supplementary material for: The Environmental Impacts of Disposable Nonwoven Fabrics during the COVID-19 Pandemic: Case Study on the Francesc de Borja Hospital
Source: MDPI journal article supplement (doi:10.3390/polym15051130), 2023-02-23
Supplement: s1 [file s1]

**Table S1.** Nomenclature

| Abbreviation    | Term                                                       |
|-----------------|------------------------------------------------------------|
| PPE             | Personal Protective Equivalent                             |
| SMS             | spunbond/meltblown/spunbond                                |
| AAMI            | Association for the Advancement of Medical Instrumentation |
| AATCC           | American Association of Textile Chemists and Colorists     |
| HCW             | Health Care Workers                                        |
| LCA             | Life Cycle Assessment                                      |
| LCI             | Life Cycle Inventory                                       |
| PP              | Polypropylene                                              |
| CO <sub>2</sub> | Carbon Dioxide                                             |
| CTUh            | Comparative Toxic Unit for human                           |
| U-235           | Uranium-235                                                |
| CFC11           | Trichlorofluoromethane                                     |
| MJ              | Megajoule                                                  |
| NMVOC           | Non-methane volatile organic compound                      |
| Sb              | Antimony                                                   |
